# Supplementary material for: A novel nano-silver coated and hydrogel-impregnated polyurethane nanofibrous mesh for ventral hernia repair
Source: Royal Society of Chemistry journal article supplement (doi:10.1039/c6ra10014g), 2016-01-01

### Supporting information

Figure S1. H+E stained sections from rats implanted with NSPU mesh. A. brain, B. kidney, C. liver, D. heart, E. spleen and F. testicles; all sections were no abnormalities observed

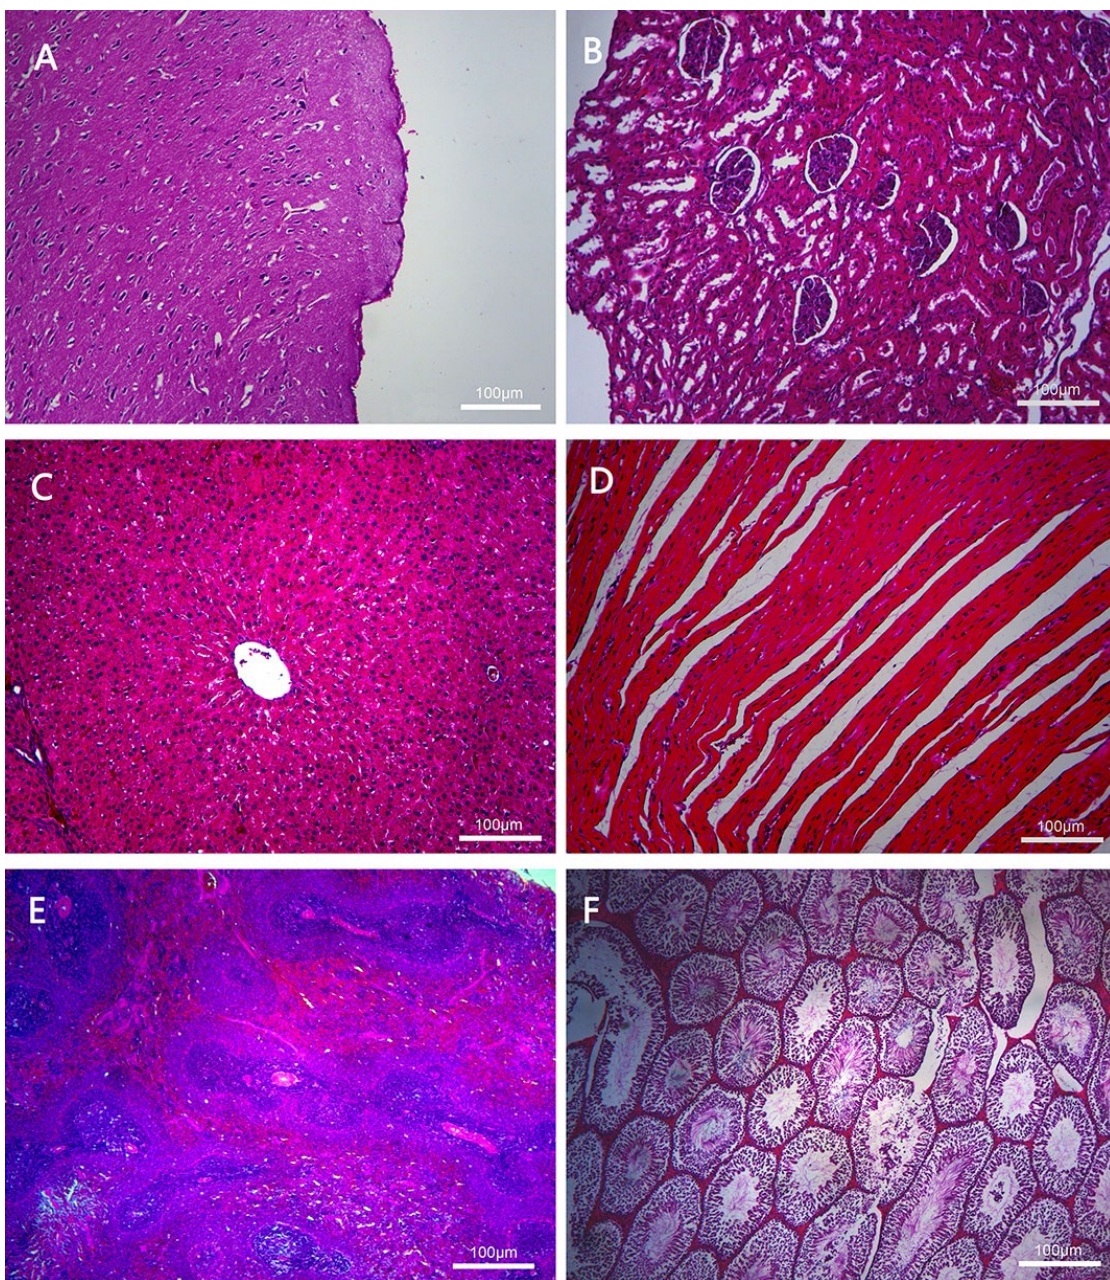

Supplement: c6ra10014g1.pdf [file c6ra10014g1.pdf]
